# Supplementary material for: Nursing Care Coordination for Patients with Complex Needs in Primary Healthcare: A Scoping Review
Source: PubMed Central journal article supplement (PMC7977020; doi:10.5334/ijic.5518), 2021-03-19
Supplement: ijic-21-1-5518-s1.pdf [file ijic-21-1-5518-s1.pdf]

## Appendix 1 : Search strategy

Interface: EBSCOhost

Databases: CINAHL Plus with full text; Medline with full text

Date: October 9<sup>th</sup>, 2019

Hits : 2264

|          |                                                                                                                                                                                                                                                                                                                                                                                                                                                                                                                                                                                                                                                                      |
|----------|----------------------------------------------------------------------------------------------------------------------------------------------------------------------------------------------------------------------------------------------------------------------------------------------------------------------------------------------------------------------------------------------------------------------------------------------------------------------------------------------------------------------------------------------------------------------------------------------------------------------------------------------------------------------|
| ≠1       | TI ( "case management" OR "care management" OR "disease* management" OR "patient navigation" OR "integrated care" OR "care coordinat*" OR "patient-centered medical home" OR "Delivery of Health Care, Integrated" ) OR AB ( "case management" OR "care management" OR "disease* management" OR "patient navigation" OR "integrated care" OR "care coordinat*" OR "patient-centered medical home" OR "Delivery of Health Care, Integrated" ) OR SU ( "case management" OR "care management" OR "disease* management" OR "patient navigation" OR "integrated care" OR "care coordinat*" OR "patient-centered medical home" OR "Delivery of Health Care, Integrated" ) |
| ≠2       | TI ( "primary health care" OR "primary care" OR "primary healthcare" ) OR AB ( "primary health care" OR "primary care" OR "primary healthcare" ) OR SU ( "primary health care" OR "primary care" OR "primary healthcare" )                                                                                                                                                                                                                                                                                                                                                                                                                                           |
| ≠3       | TI nurs* OR AB nurs* OR SU nurs*                                                                                                                                                                                                                                                                                                                                                                                                                                                                                                                                                                                                                                     |
| ≠4       | 1 AND 2 AND 3                                                                                                                                                                                                                                                                                                                                                                                                                                                                                                                                                                                                                                                        |
| Limiters | Language: English, French<br>Research article<br>Publication type: case study, clinical trial, journal article, nursing intervention, randomized controlled trial, research<br>Search modes: find all my search terms                                                                                                                                                                                                                                                                                                                                                                                                                                                |

Databases: Scopus

Date: October 17<sup>th</sup>, 2019

Hits: 1753

|                                                                                                                                                                                                                                                                                                                                                                                                                                                                                                                                                                   |
|-------------------------------------------------------------------------------------------------------------------------------------------------------------------------------------------------------------------------------------------------------------------------------------------------------------------------------------------------------------------------------------------------------------------------------------------------------------------------------------------------------------------------------------------------------------------|
| <p>( TITLE-ABS-KEY ( "case management" OR "care management" OR "disease* management" OR "patient navigation" OR "integrated care" OR "care coordinat*" OR "patient-centered medical home" OR "Delivery of Health Care,Integrated" )</p> <p>AND</p> <p>TITLE-ABS-KEY ( "primary health care" OR "primary care" OR "primary healthcare" )</p> <p>AND</p> <p>TITLE-ABS-KEY ( "nurs*" ) ) AND ( LIMIT-TO ( PUBSTAGE , "final" ) ) AND ( LIMIT-TO ( DOCTYPE , "ar" ) )</p> <p>AND</p> <p>( LIMIT-TO ( LANGUAGE , "English" ) OR LIMIT-TO ( LANGUAGE , "French" ) )</p> |
|-------------------------------------------------------------------------------------------------------------------------------------------------------------------------------------------------------------------------------------------------------------------------------------------------------------------------------------------------------------------------------------------------------------------------------------------------------------------------------------------------------------------------------------------------------------------|

Databases: ProQuest (dissertations and thesis)

Date: October 8<sup>th</sup>, 2019

Hits: 346

```
(ti("case management" OR "care management" OR "disease* management" OR "patient navigation" OR "integrated care" OR "care coordinat*" OR "patient-centered medical home" OR "Delivery of Health Care, Integrated") OR ab("case management" OR "care management" OR "disease* management" OR "patient navigation" OR "integrated care" OR "care coordinat*" OR "patient-centered medical home" OR "Delivery of Health Care, Integrated") OR su("case management" OR "care management" OR "disease* management" OR "patient navigation" OR "integrated care" OR "care coordinat*" OR "patient-centered medical home" OR "Delivery of Health Care, Integrated"))
```

AND

```
(ti("primary health care" OR "primary care" OR "primary healthcare") OR ab("primary health care" OR "primary care" OR "primary healthcare") OR su("primary health care" OR "primary care" OR "primary healthcare"))
```

AND

```
(ti("nurs*") OR ab("nurs*") OR su("nurs*"))
```

AND

```
la.exact("ENG" OR "FRE")
```
